# Supplementary material for: Investigation of Cannabinoid Acid/Cyclodextrin Inclusion Complex for Improving Physicochemical and Biological Performance
Source: MDPI journal article supplement (doi:10.3390/pharmaceutics15112533), 2023-10-26
Supplement: s1 [file s1]

**Table S1.** pH-dependent solubility of (A) THCA and (B) CBDA with M- $\beta$ -CD complex

| (A) THCA |                                             |
|----------|---------------------------------------------|
| pH       | The solubility of THCA ( $\mu\text{g/mL}$ ) |
| 2.34     | Not detected                                |
| 3.25     | Not detected                                |
| 4.05     | $1.2 \pm 0.3$                               |
| 5.10     | $8.0 \pm 0.2$                               |
| 7.05     | $91 \pm 4$                                  |
| 8.01     | $240 \pm 10$                                |
| 9.05     | $650 \pm 10$                                |
| 10.31    | $1780 \pm 20$                               |
| 11.08    | $3260 \pm 50$                               |
| (B) CBDA |                                             |
| pH       | The solubility of CBDA ( $\mu\text{g/mL}$ ) |
| 2.52     | Not detected                                |
| 3.38     | Not detected                                |
| 4.10     | $2.3 \pm 0.2$                               |
| 5.52     | $10.3 \pm 0.4$                              |
| 7.03     | $140 \pm 20$                                |
| 8.18     | $300 \pm 20$                                |
| 9.03     | $890 \pm 10$                                |
| 10.24    | $2690 \pm 130$                              |
| 10.93    | $5220 \pm 110$                              |

**(A) M- $\beta$ -CD (Randomly methylated- $\beta$ -cyclodextrin)**

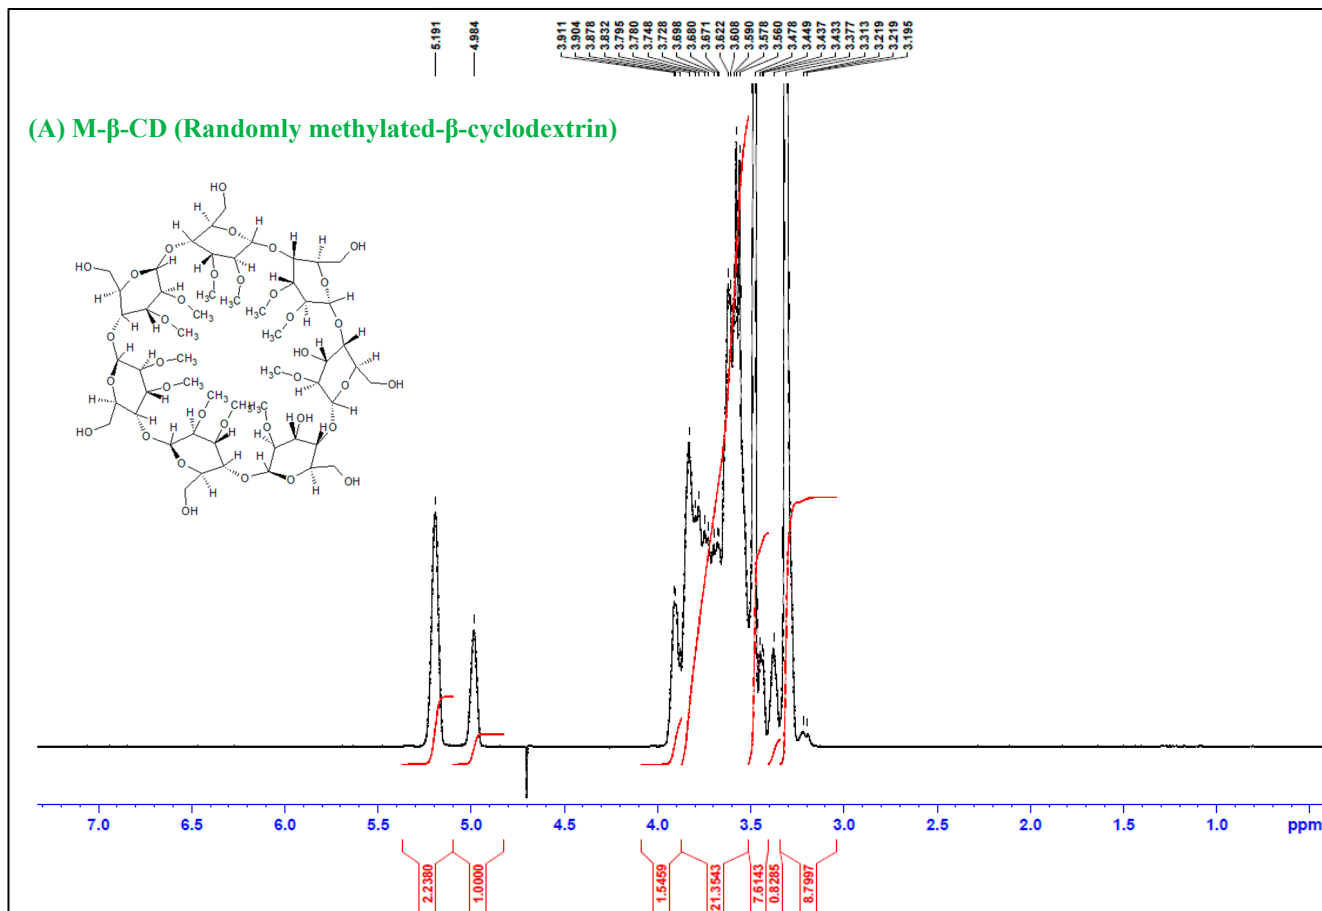

**(B) THCA/M- $\beta$ -CD Spray-freeze-dried inclusion complex**

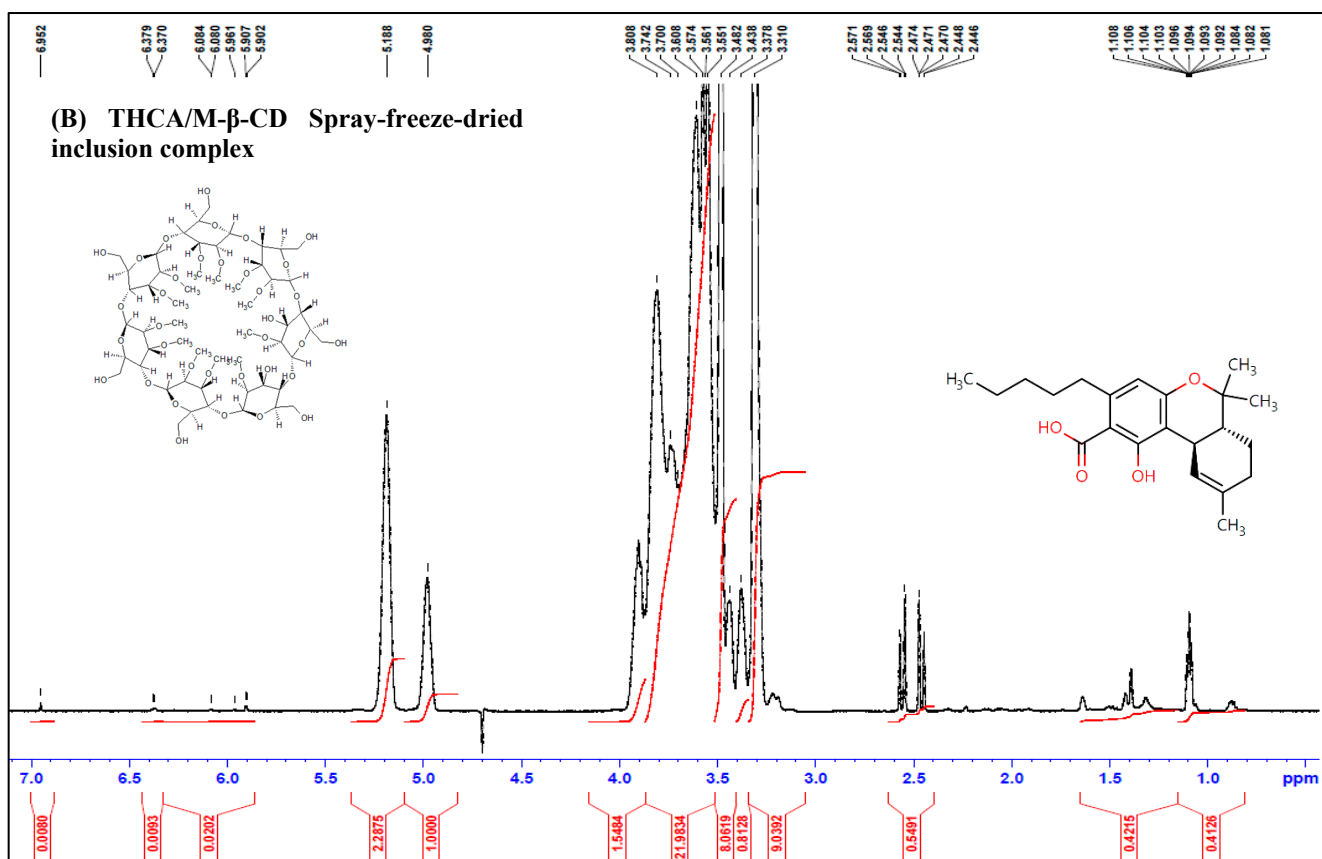

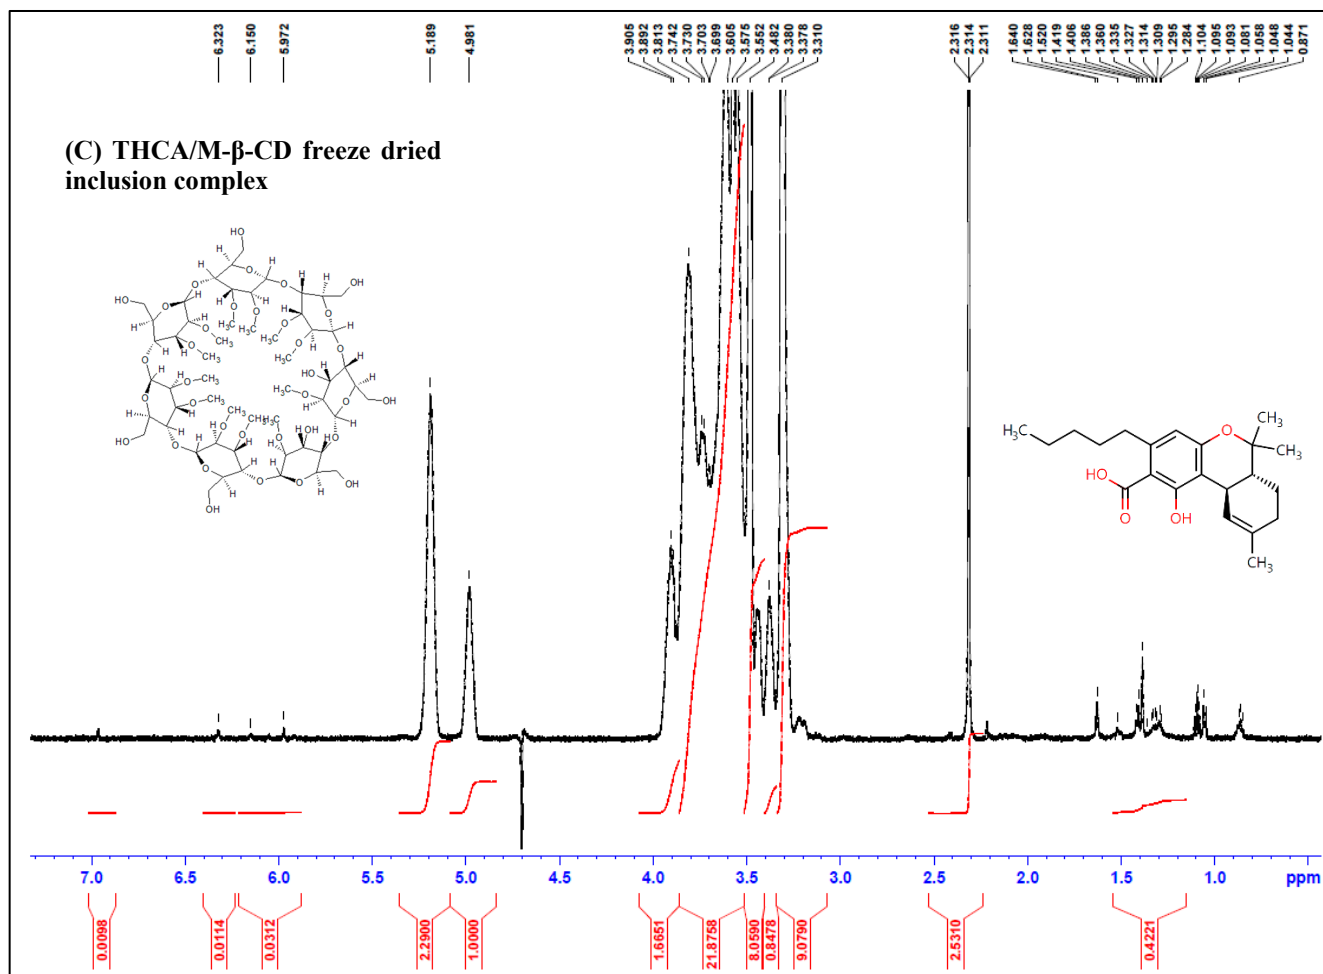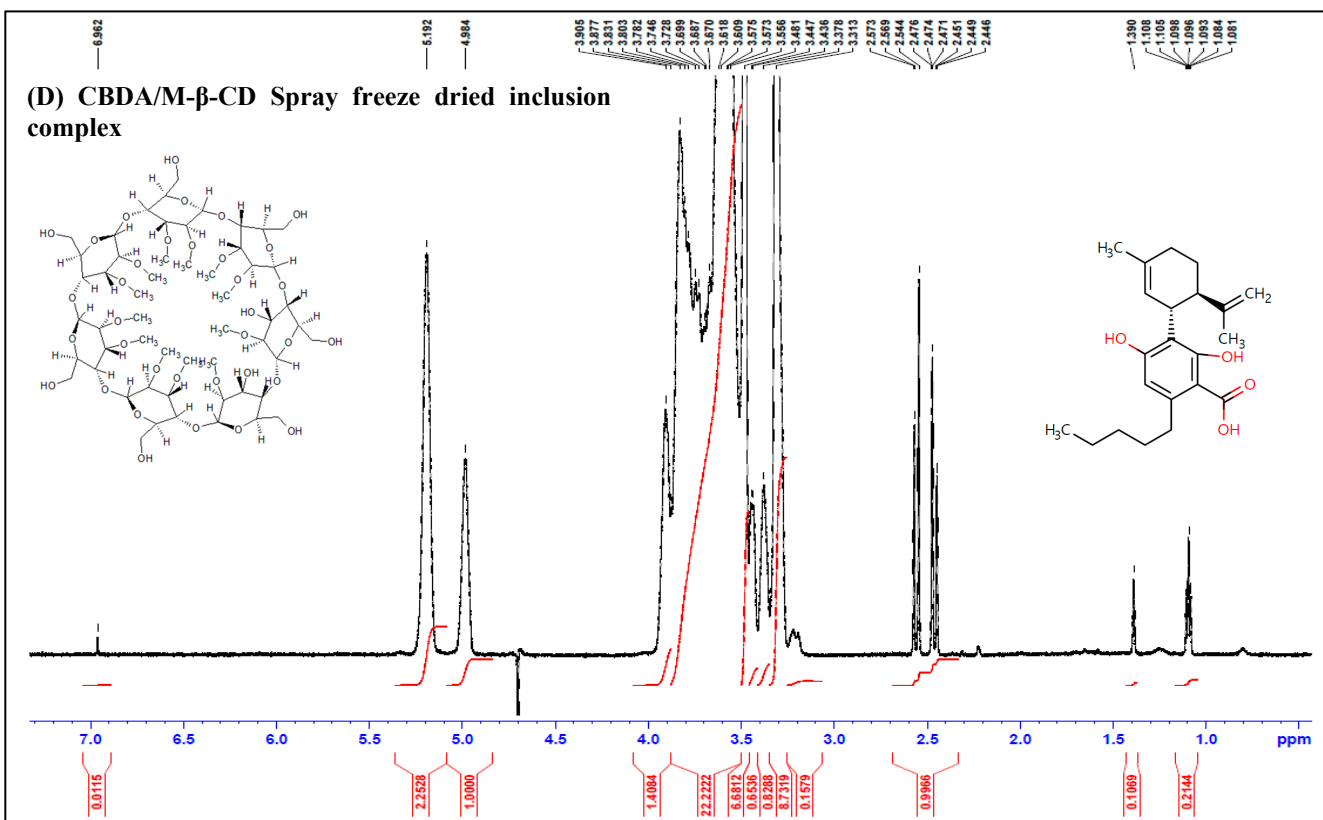

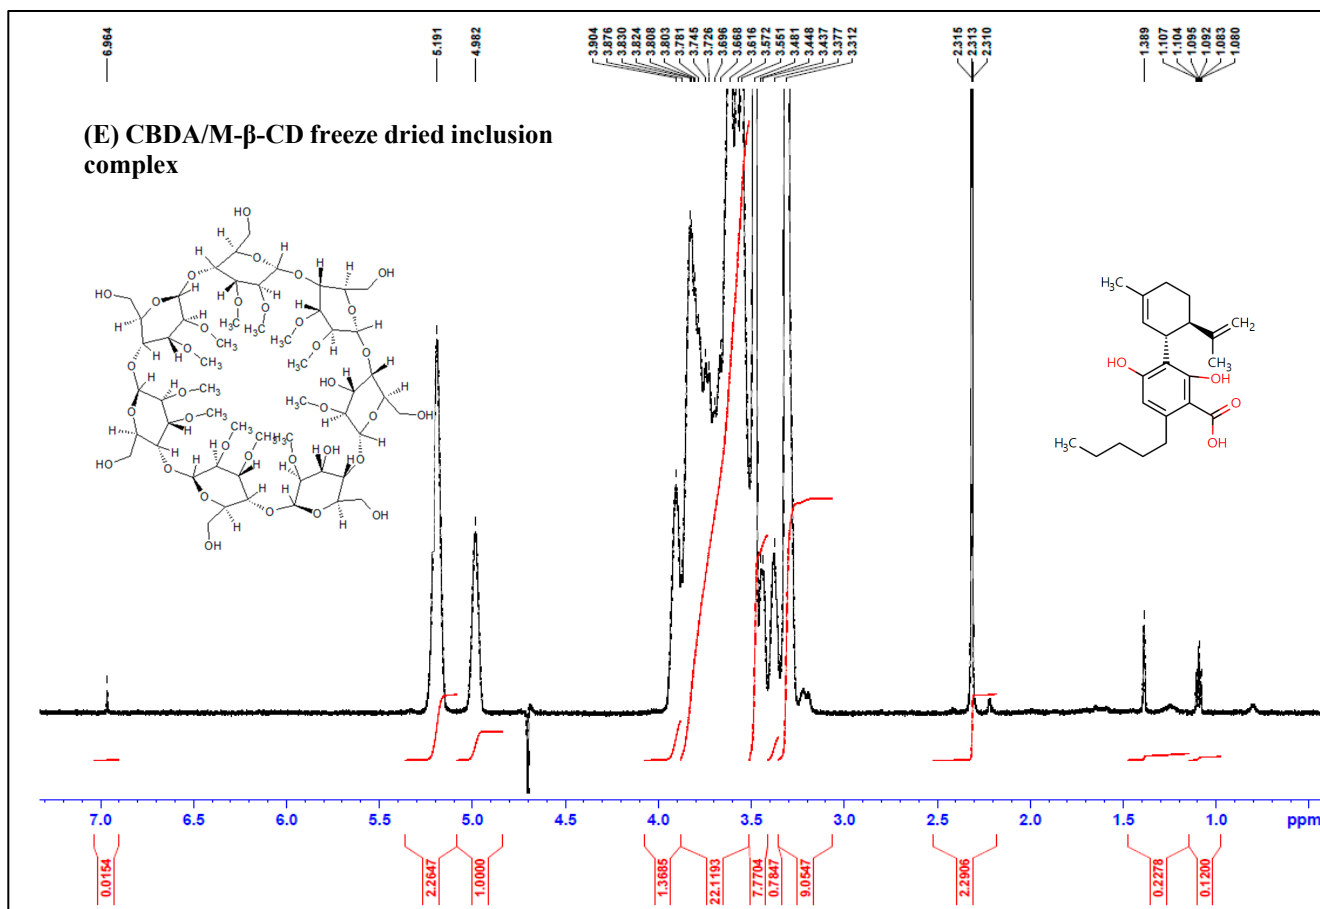

**Figure S1.** Enlarged version of  $^1\text{H}$  NMR spectra with (A) M- $\beta$ -CD, (B) THCA/M- $\beta$ -CD Spray freeze dried inclusion complex, (C) THCA/M- $\beta$ -CD freeze dried inclusion complex, (D) CBDA/M- $\beta$ -CD Spray freeze dried inclusion complex, and (E) CBDA/M- $\beta$ -CD freeze dried inclusion complex
